# Supplementary material
Source: publisher site journal article supplement (https://www.dovepress.com/article/369556)
Supplement: Supplementary file 1 [file get_supplementary_file.php]

**Supplementary Table 1.** Clinical characteristic of DM patients in the validation cohort.

|  | DM with RP-ILD  (N = 5) | DM without RP-ILD  (N = 22) | *P*-value |
| --- | --- | --- | --- |
| Age (years) | 57.60 ± 7.64 | 53.27 ± 11.63 | 0.475 |
| Female (%) | 3 (60) | 15(68.18) | 0.726 |
| Disease duration (months) | 2.30 ± 2.28 | 7.25 ± 11.03 | 0.107 |
| Muscle weakness (%) | 5 (100) | 5(100) | / |
| Gottron's sign (%) | 3(60) | 12(54.55) | 0.825 |
| Heliotrope rash (%) | 2 (40) | 13(59.09) | 0.438 |
| V rush (%) | 3(60) | 9(40.91) | 0.438 |
| Shawl sign (%) | 3(60) | 5(22.73) | 0.099 |
| Periungueal erythema (%) | 0(0) | 6(27.27) | 0.186 |
| Arthritis (%) | 2(40) | 11(50) | 0.686 |
| Mechanic's hand (%) | 1(20) | 7(31.82) | 0.601 |
| Skin ulcers (%) | 0(0) | 4 (18.18) | 0.302 |
| ALT (U/L) | 50.12 ± 25.15 | 110.1 ± 99.13 | 0.208 |
| AST (U/L) | 62.48 ± 43.94 | 118 ± 156.5 | 0.441 |
| LDH (U/L) | 625.8 ± 282.17 | 494.5 ± 370.5 | **0.036** |
| CK (U/L) | 291.6 ± 127.32 | 381.91 ± 164.33 | 0.705 |
| ESR (mm/h) | 45.2 ± 12.64 | 45.18 ± 29.14 | 0.554 |
| CRP (mg/L) | 21.78 ± 10.27 | 16.12 ± 9.87 | 0.054 |
| Serum ferritin (ng/ml) | 1052.13 ± 86.86 | 927.61 ± 425.04 | 0.226 |
| ANA positive (%) | 1(20) | 8(36.36) | 0.484 |
| Anti-Ro52 antibody positive (%) | 4(80) | 5(22.73) | **0.014** |
| Anti-ARS antibody positive (%) | 0(0) | 2(9.09) | 0.484 |
| Anti-MDA5 antibody positive (%) | 5(100) | 4(18.18) | **0.001** |

Notes: Bold values are statistically significant (*P* < 0.05).

Abbreviations: DM: dermatomyositis; RP-ILD: rapidly progressive interstitial lung disease; ALT: glutamate transaminase; AST: aspartate transaminase; LDH: lactate dehydrogenase; CK: creatine kinase; ESR: erythrocyte sedimentation rate; CRP: C-reactive protein; SF: serum ferritin; ANA: antinuclear antibody; anti-ARS antibodies: anti-aminoacyl-tRNA synthetase antibodies; anti MDA5 antibody: anti melanoma differentiation-associated gene 5 antibody.
